# Supplementary material for: Preparation and characterization of an imogolite/chitosan hybrid with pyridoxal-5′-phosphate as an interfacial modifier
Source: Royal Society of Chemistry journal article supplement (doi:10.1039/d1ra04774d), 2021-01-01
Supplement: d1ra04774d1.pdf [file d1ra04774d1.pdf]

# Preparation and Characterization of Imogolite/Chitosan Hybrid with Pyridoxal- 5'-phosphate as an Interfacial Modifier

*Masaru Mukai<sup>a</sup>, Akihiko Takada<sup>a</sup>, Ayumi Hamada<sup>a</sup>, Tomoko Kajiwara<sup>a</sup>, Atsushi*

*Takahara<sup>a,b,\*</sup>*

<sup>a</sup>Institute for Materials Chemistry and Engineering, Kyushu University, 744 Motooka,  
Nishi-ku, Fukuoka 819-0395, Japan

<sup>b</sup>Research Center for Negative Emission Technology, Kyushu University, 744 Motooka,  
Nishi-ku, Fukuoka 819-0395, Japan.

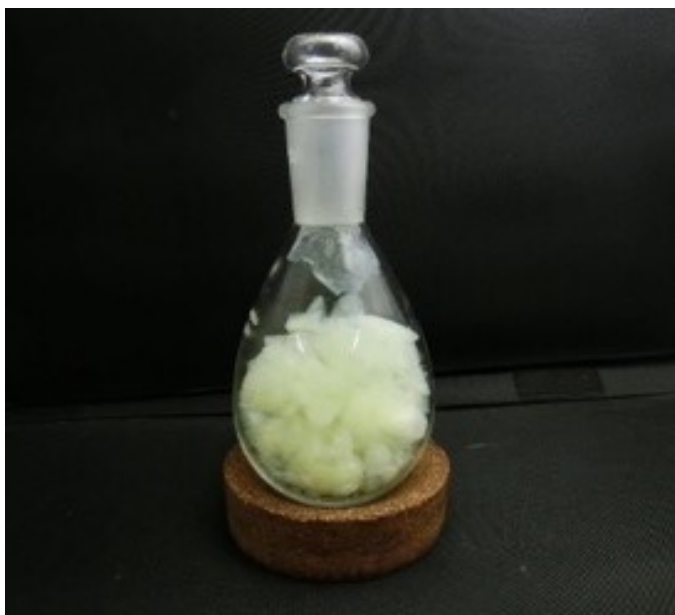

**Fig. S1.** Picture of dry PLP-imogolite.

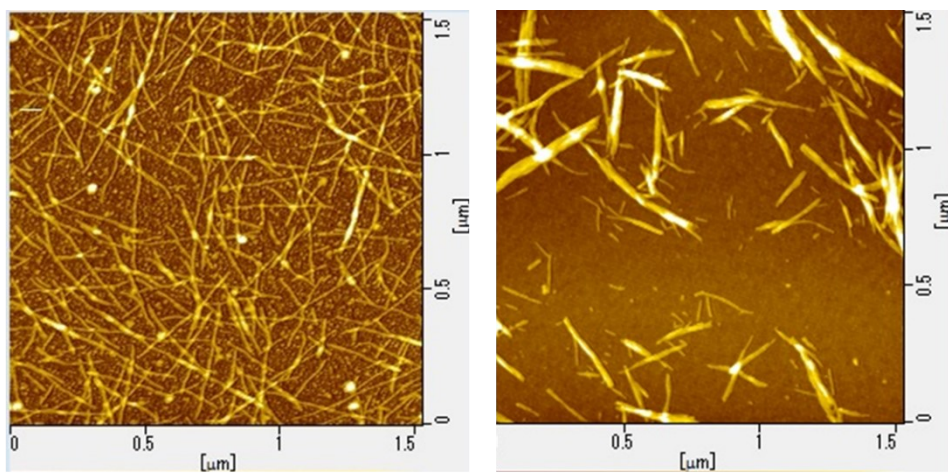

**Fig. S2.** SFM image of pristine-imogolite (left) and PLP-imogolite (right).

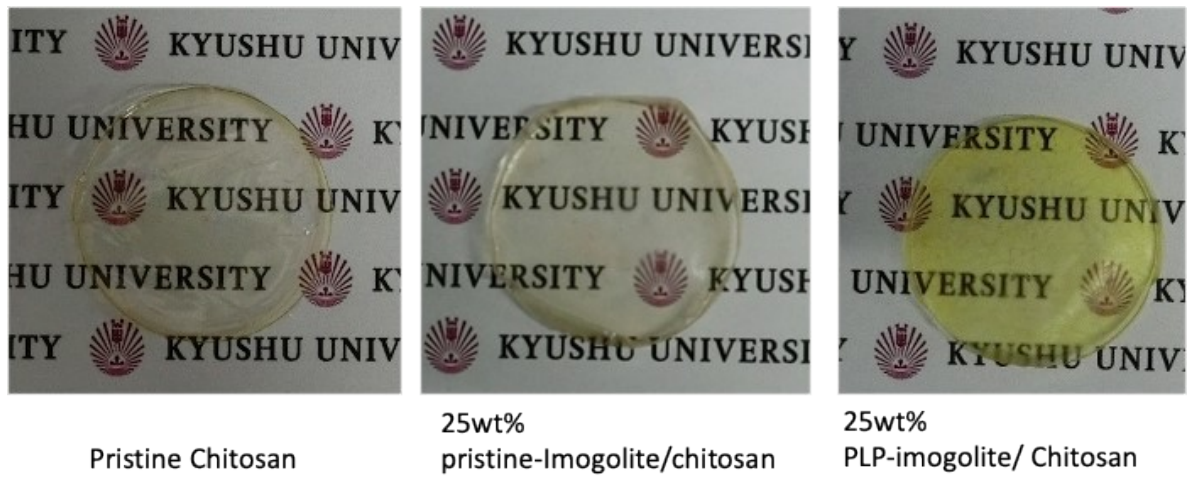

**Fig. S3.** Image of (a) pristine-chitosan, (b) 25 wt% pristine-imogolite/chitosan, and (c) 25 wt% PLP–imogolite/chitosan hybrid films.

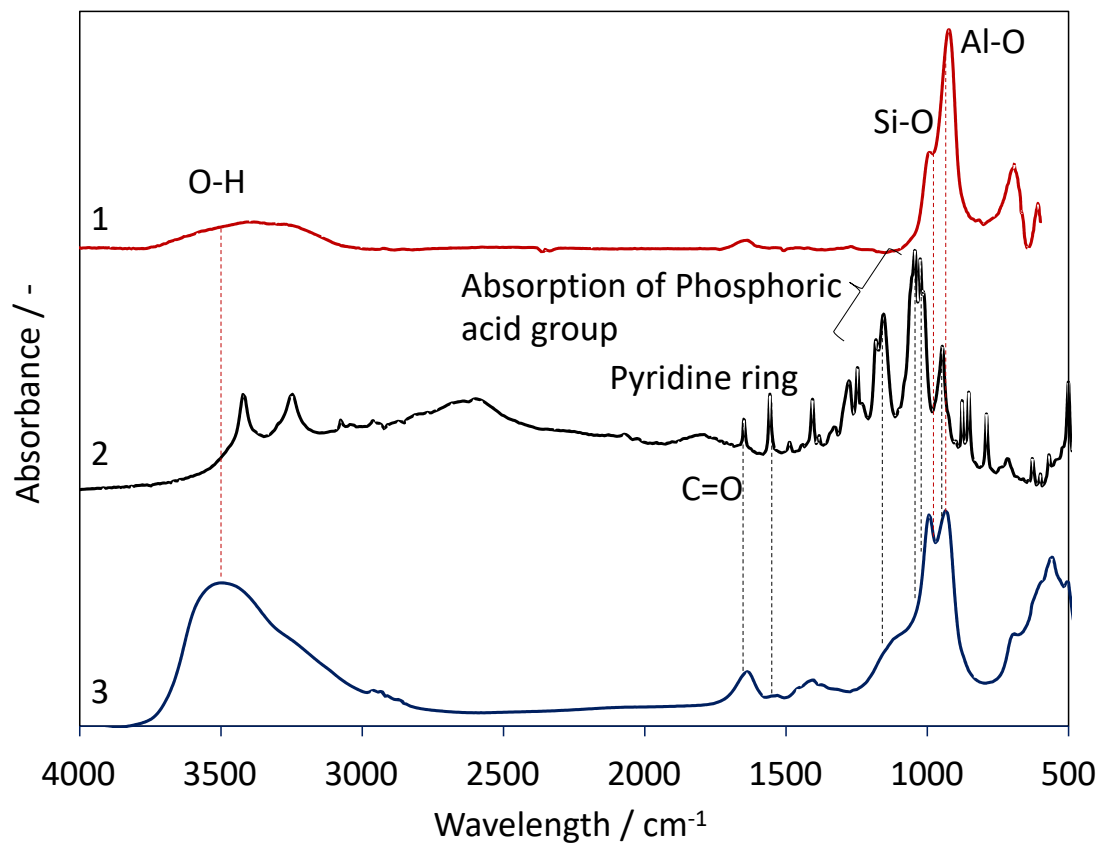

**Fig. S4.** FT-IR spectra of pristine imogolite (1, red line), pure PLP (2, black line) PLP-imogolite (3, blue line).

The amount of PLP adsorption ( $W_{PLP}$ ) on imogolite was calculated from the following equation (1).

$$W_{PLP} = (W_{873K} - W'_{873K}) - (W_{393K} - W'_{393K}) \quad (1)$$

Where  $W_{873K}$  (72.2 wt%) and  $W'_{873K}$  (64.7 wt%) represent the total weight loss before and after PLP modification at 873 K, respectively. Therefore, the difference in total weight loss was 7.5 wt% before and after PLP modification. On the other hand,  $W_{393K}$  (90.1 wt%) and  $W'_{393K}$  (85.0 wt%) were weight loss of before and after PLP modification at 393 K due to evaporation of water (5.2 wt%), respectively. When PLP adsorbs on the imogolite surface, the amount of water adsorbed also changes. The amount of PLP adsorbed was obtained by subtracting the water-derived weight loss from the difference in total weight loss. The results confirmed that 2.3 wt% of PLP was adsorbed on imogolite.

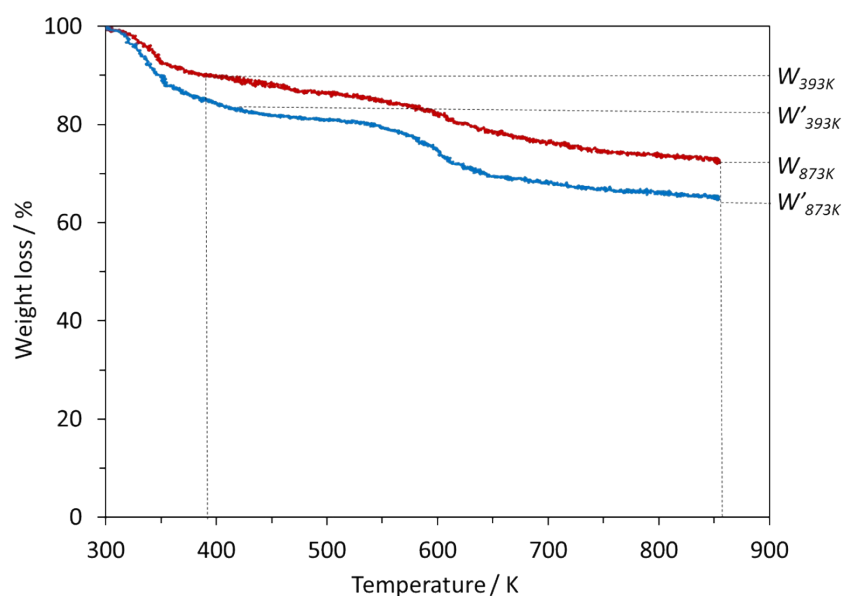

**Fig. S5.** Thermogravimetric analysis curve for imogolite before (red line) and after (blue line) PLP modification.

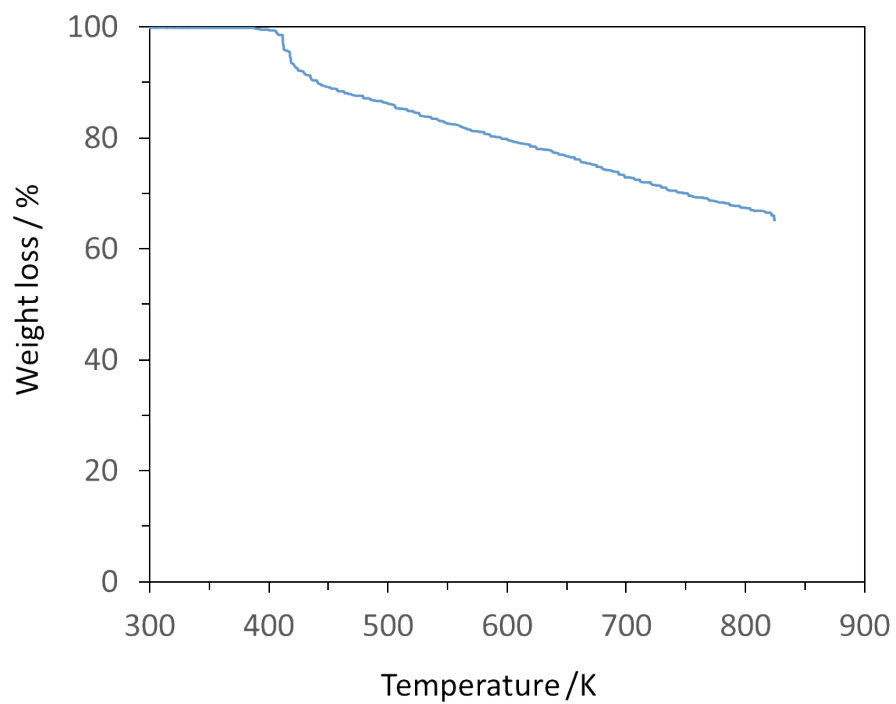

**Fig. S6.** . Thermogravimetric analysis curve for pure PLP.

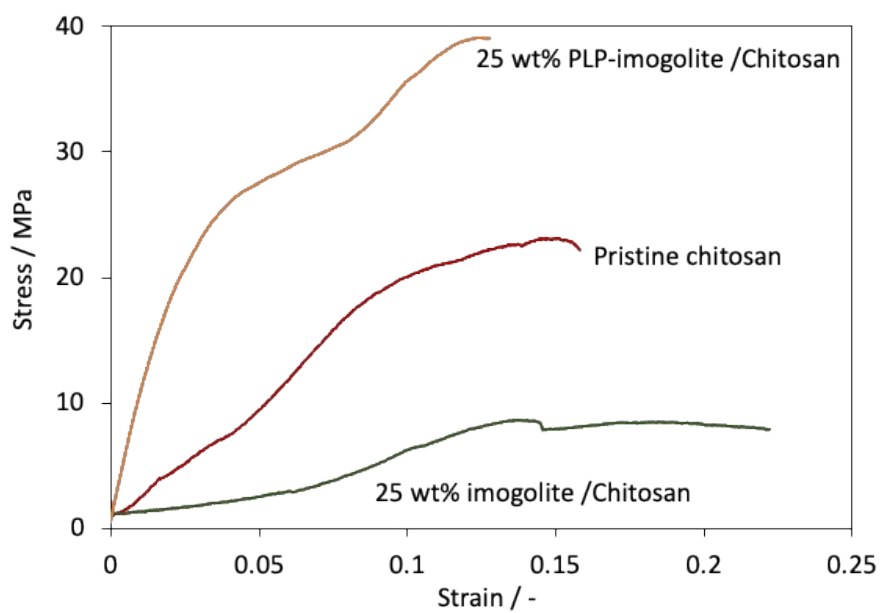

**Fig. S7.** Typical strain–stress curve of each hybrid film at room temperature.
